# Supplementary material
Source: PubMed Central journal article supplement (PMC5952390)
Supplement: JB.00736-17_zjb999094721s1.pdf [file JB.00736-17_zjb999094721s1.pdf]

**Supplemental Tables and Figures.**

**Functional analyses of the RsmY and RsmZ small non-coding regulatory RNAs in  
*Pseudomonas aeruginosa***

**Janssen et al.**

Table S1. Strain and plasmids used in this study

| Strains                           | Relevant characteristics                                                       | Source           |
|-----------------------------------|--------------------------------------------------------------------------------|------------------|
| <i>E. coli</i>                    |                                                                                |                  |
| DH5a                              | <i>supE44 DlacU169 (f80 lacZDM15) hsdR17<br/>recA1 endA1 gyrA96 thi-1relA1</i> | Hanahan          |
| SM10                              | <i>thi thr leu tonA lacY supE recA::RP4-2Tc::Mu Km</i>                         | Simon et al      |
| <i>P. aeruginosa</i>              |                                                                                |                  |
| PA103                             |                                                                                |                  |
| PA103 $\Delta$ rsmYZ              |                                                                                | Intile et al     |
| PA103 $\Delta$ rsmA               |                                                                                | Marden et al     |
| PA103 $\Delta$ rsmF               |                                                                                | Marden et al     |
| PA103 $\Delta$ rsmAF              |                                                                                | Marden et al     |
| PA103 $\Delta$ rsmAYZ             |                                                                                | Marden et al     |
| PA103 $\Delta$ rsmFYZ             |                                                                                | This study       |
| PA103 $\Delta$ rsmAFYZ            |                                                                                | This study       |
| <u>Plasmids</u>                   |                                                                                |                  |
| pEXG2                             | cloning vector for allelic exchange                                            | Rietsch et al    |
| pEXG2 $\Delta$ rsmF               | cloning vector for allelic exchange $\Delta$ rsmF                              | Marden et al     |
| pJN105                            | Arabinose inducible expression vector                                          | Newman and Fuqua |
| pminiCTX                          | Cloning vectore for chromosomal integration at CTX site                        | Hoang et al      |
| pminiCTX-P <sub>tssA1'-lacZ</sub> | mini-CTX with P <sub>tssA1'-lacZ</sub> fusion                                  | Marden et al     |
| pRsmA (p2UY83)                    | RsmA expression vector, pJN105 backbone                                        | Marden et al     |
| pRsmF (p2UY37)                    | RsmF expression vector, pJN105 backbone                                        | Marden et al     |
| pRsmY                             | RsmY expression vector, pJN105 backbone                                        | Intile et al     |
| pRsmY GGA2                        | pRsmY bearing GGA2 substitution                                                | This study       |
| pRsmY GGA5                        | pRsmY bearing GGA5 substitution                                                | This study       |
| pRsmY GGA7                        | pRsmY bearing GGA7 substitution                                                | This study       |
| pRsmY GGA25                       | pRsmY bearing GGA25 substitutions                                              | This study       |
| pRsmY GGA57                       | pRsmY bearing GGA57 substitutions                                              | This study       |
| pRsmY GGA27                       | pRsmY bearing GGA27 substitutions                                              | This study       |
| pRsmY GGA257                      | pRsmY bearing GGA257 substitutions                                             | This study       |
| pRsmZ (p3UY22)                    | pRsmZ expression vector, pJN105 backbone                                       | Intile et al     |
| pRsmZ GGA1                        | pRsmZ bearing GGA1 substitution                                                | This study       |
| pRsmZ GGA2                        | pRsmZ bearing GGA2 substitution                                                | This study       |
| pRsmZ GGA5                        | pRsmZ bearing GGA5 substitution                                                | This study       |
| pRsmZ GGA6                        | pRsmZ bearing GGA6 substitution                                                | This study       |
| pRsmZ GGA25                       | pRsmZ bearing GGA25 substitutions                                              | This study       |
| pRsmZ GGA56                       | pRsmZ bearing GGA56 substitutions                                              | This study       |
| pRsmZ GGA26                       | pRsmZ bearing GGA26 substitutions                                              | This study       |
| pRsmZ GGA256                      | pRsmZ bearing GGA256 substitutions                                             | This study       |
| pRsmZ GGA1256                     | pRsmZ bearing GGA1256 substitutions                                            | This study       |

Table S2. Plasmid and probe construction details.

| <u>Plasmid</u>  | <u>Primers pairs used to generate PCR product(s)</u> | <u>Template</u> |
|-----------------|------------------------------------------------------|-----------------|
| pRsmY GGA2      | 118488206-119108926 118351239-119108925              | pRsmY           |
| pRsmY GGA5      | 118488206-119108928 118351239-119108927              | pRsmY           |
| pRsmY GGA7      | 118488206-118488188 118351239-118488187              | pRsmY           |
| pRsmY GGA25     | 118488206-119108926 118351239-119108925              | pRsmY GGA5      |
| pRsmY GGA57     | 118488206-119554393 118351239-119554392              | pRsmY GGA5      |
| pRsmY GGA27     | 118488206-119108926 118351239-119108925              | pRsmY GGA7      |
| pRsmY GGA257    | 118488206-119108926 118351239-119108925              | pRsmY GGA57     |
| pRsmZ GGA1      | 118488206-126681303 118351239-126681302              | pRsmZ           |
| pRsmZ GGA2      | 118488206-118351233 118351239-118351232              | pRsmZ           |
| pRsmZ GGA5      | 118488206-118351235 118351239-118351234              | pRsmZ           |
| pRsmZ GGA6      | 118488206-118351237 118351239-118351236              | pRsmZ           |
| pRsmZ GGA25     | 118488206-118759540 118351239-118618111              | pRsmZ GGA2      |
| pRsmZ GGA56     | 118488206-118759539 118351239-118656985              | pRsmZ GGA6      |
| pRsmZ GGA26     | 118488206-118351237 118351239-118351236              | pRsmZ GGA2      |
| pRsmZ GGA256    | 118488206-119108996 118351239-119108995              | pRsmZ GGA56     |
| pRsmZ GGA1256   | 118488206-126681305 118351239-126681304              | pRsmZ GGA256    |
| <u>Probe</u>    | <u>Primers pairs used to generate PCR product(s)</u> | <u>Template</u> |
| RsmY            | 59928377-59928380                                    | pRsmY           |
| RsmY GGA2       | 59928377-59928380                                    | pRsmY GGA2      |
| RsmY GGA5       | 59928377-59928380                                    | pRsmY GGA5      |
| RsmY GGA7       | 59928377-59928380                                    | pRsmY GGA7      |
| RsmY GGA25      | 59928377-59928380                                    | pRsmY GGA25     |
| RsmY GGA57      | 59928377-59928380                                    | pRsmY GGA57     |
| RsmY GGA27      | 59928377-59928380                                    | pRsmY GGA27     |
| RsmY GGA257     | 59928377-59928380                                    | pRsmY GGA257    |
| RsmY GGA134     | 130634797-130634798                                  | 130851998       |
| RsmY GGA 123457 | 130634797-130634798                                  | 130629833       |
| RsmZ            | 47607884-47607885                                    | pRsmZ           |
| RsmZ GGA1       | 130520981-47607884                                   | pRsmZ GGA1      |
| RsmZ GGA2       | 47607884-47607885                                    | pRsmZ GGA2      |
| RsmZ GGA5       | 47607884-47607885                                    | pRsmZ GGA5      |
| RsmZ GGA6       | 47607884-47607885                                    | pRsmZ GGA6      |
| RsmZ GGA15      | 130520981-47607884                                   | pRsmZ GGA15     |
| RsmZ GGA25      | 47607884-47607885                                    | pRsmZ GGA25     |
| RsmZ GGA56      | 47607884-47607885                                    | pRsmZ GGA56     |
| RsmZ GGA26      | 47607884-47607885                                    | pRsmZ GGA26     |
| RsmZ GGA256     | 47607884-47607885                                    | pRsmZ GGA256    |
| RsmZ GGA1256    | 130520981-47607884                                   | pRsmZGGA1256    |
| RsmZ GGA147     | 130520981-47607884                                   | 130269402       |
| RsmZ GGA124567  | 130520981-47607884                                   | 130269401       |

Table S3. Primers and gBlocks used in this study.

| Primers   |                                   |                                                                   |
|-----------|-----------------------------------|-------------------------------------------------------------------|
| ID        | Name                              | Sequence                                                          |
| 117830775 | pBAD Gibson Mlu                   | 5'- CCAAAGCCATGACAAAAACGCGTAAC                                    |
| 117830776 | pBAD Gibson                       | 5'- ATGGAGAAACAGTAGAGAGTTGCGATAAA                                 |
| 118351232 | RsmZ GAA1 back                    | 5'- GTACAGGGAACACGCAACCCCGAACCTTC<br>GGGGAAGGGACGTCGCCAGGG        |
| 118351233 | RsmZ GAA1 front                   | 5'- CCCTGGCGACGTCCCTTCCCCGAAGGTTT<br>GGGGTTGCGTGTTCCCTGTAC        |
| 118351234 | RsmZ GGA2 back                    | 5'- GATCGGGGAAGGGACGTCGCCAGCCTGGC<br>GATTCATCAGGATGATGACGAGG      |
| 118351235 | RsmZ GAA2 front                   | 5'- CTCGTCATCATCCTGATGAATCGCCAGGC<br>TGCGACGTCCCTTCCCCGATC        |
| 118351236 | RsmZ GAA3 back                    | 5'- GTCGCCAGGGAGGCGATTCATCACCTTGA<br>TGACGAGGGACTGAAGAGTGGG       |
| 118351237 | RsmZ GAA3 front                   | 5'- CCCACTCTTCAGTCCCTCGTCATCAAGGT<br>GATGAATCGCCTCCCTGGCGAC       |
| 118351239 | pJN PvuI Gibson                   | 5'- GCAACTGTTGGGAAGGGCGATCGG                                      |
| 118488187 | RsmY GGA3 back                    | 5'- ATGGTGGCGTAGCACGGATGTCACCTTAG<br>AGGTCTGCAAACCCCGCCCA         |
| 118488188 | RsmY GGA3 front                   | 5'- TGGGCGGGGTTTTGCAGACCTCTAAGGTG<br>ACATCCGTGCTACGCCACCAT        |
| 118488206 | pJN Nru Gibson                    | 5'- CCCACTGGTGATACCATTTCGCGAGCC                                   |
| 118618111 | RsmZ GGA1 + GGA2                  | 5'- GTACAGGGAACACGCAACCCCGAACCTTC<br>GGGGAAGGGACGTCGCCAGCC        |
| 118759539 | RsmZ GGA2 to 3 front              | 5'- CCCACTCTTCAGTCCCTCGTCATCAAGGT<br>GATGAATCGCCAGGCTGGCGAC       |
| 118759540 | RsmZGGA(1) to 2 front             | 5'- GGCTGGCGACGTCCCTTCCCCGAAGGTTT<br>GGGGTTGCGTGTTCCCTGTAC        |
| 118656985 | RsmZ GGA2 to 3(back)              | 5'- GTCGCCAGCCTGGCGATTCATCACCTTGAT<br>GACGAGGGACTGAAGAGTGGG       |
| 119108925 | RsmY GGA1<br>back PA103           | 5'- TTTCTCCATGTCAGGACATTGCGCACCTA<br>GCGCCAAAGACAATACGGAAACCAA    |
| 119108926 | RsmY GGA1<br>front PA103          | 5'- TTGGTTTCCGTATTGTCTTTGGCGCTAGG<br>TCCGCAATGTCCTGACATGGAGAAA    |
| 119108927 | RsmY GGA2<br>back PA103           | 5'- TACGGAAACCAAGGGAATCCACCATCCTT<br>GGTGGCGTAGCACGGATGTCAGG      |
| 119108928 | RsmY GGA2<br>front PA103          | 5'- CCTGACATCCGTGCTACGCCACCAAGGA<br>TGGTGGATTCCCTTGTTTTCCGTA      |
| 119108995 | RsmZ final GGAs back              | 5'- CCTTCGGGGAAGGGACGTCGCCAG                                      |
| 119108996 | RsmZ final GGAs front             | 5'- CTGGCGACGTCCCTTCCCCGAAGG                                      |
| 119554392 | PA103 RsmY GGA3<br>into GGA2 bac  | 5'- TTGGTGGCGTAGCACGGATGTCACCTTAG<br>AGGTCTGCAAACCCCGCCCA         |
| 119554393 | PA103 RsmY GGA3<br>into GGA2 fron | 5'- TGGGCGGGGTTTTGCAGACCTCTAAGGTG<br>ACATCCGTGCTACGCCACCAA        |
| 121115383 | rsmA Gibson 5'                    | 5'- GCCATGGTACCCGGGGATCCAAGGAGATA<br>TACCATGCTGATTCTGACTCGTCGGGTC |

Table S3. Primers and gBlocks used in this study (cont.).

## Primers

| ID        | Name                              | Sequence                                                      |
|-----------|-----------------------------------|---------------------------------------------------------------|
| 122501196 | rsmZ_forward                      | 5'- GTACAGGGAACACGCAACCC                                      |
| 124280319 | rsmZ_reverse                      | 5'- CACTCTTCAGTCCCTCGTCATCA                                   |
| 122503154 | rsmY_forward                      | 5'- GCGCCAAAGACAATACGGAAC                                     |
| 122503155 | rsmY_reverse                      | 5'- CGGGGTTTTGCAGACCTCTA                                      |
| 123193558 | RimM_Forward                      | 5- ATCACGCCGAGCAACTG                                          |
| 123193559 | RimM_Reverse                      | 5'- CGGTTACGAGATCTGCATCC                                      |
| 126681302 | RsmZ GGA0 back                    | 5'- CTCTCTACTGTTTCTCCATCGTACAGCCT<br>ACACGCAACCCCGAAGGATCGGG  |
| 126681303 | RsmZ GGA0 front                   | 5'- CCCGATCCTTCGGGGTTGCGTGTAGGCTG<br>TACGATGGAGAAACAGTAGAGAG  |
| 126681304 | RsmZ quad back                    | 5'- CTCTCTACTGTTTCTCCATCGTACAGCCT<br>ACACGCAACCCCGAACCTTCGGG  |
| 126681305 | RsmZ quad front                   | 5'- CCCGAAGGTTTCGGGGTTGCGTGTAGGCTG<br>TACGATGGAGAAACAGTAGAGAG |
| 127879425 | RsmZ GGA0_Forward                 | 5'- GTACAGCCTACACGCAACCC                                      |
| 130520981 | RsmZ_gblock_mutant<br>_T7_Forward | 5'- TAATACGACTCACTATAGCGTACAGC                                |
| 130634797 | RsmYgBlockmutantF                 | 5'- TAATACGACTCACTATAGGTCACCT                                 |
| 130634798 | RsmYgBlockmutantR                 | 5'- AAAACCCCGCCTTTTGGGCGGGG                                   |

## SHAPE-MaP and Illumina Sequencing primers

| ID | Name    | Sequence                                                                                         |
|----|---------|--------------------------------------------------------------------------------------------------|
| NA | Rnd1Fwd | 5'- CCCTACACGACGCTCTTCCGATCTNNNNN<br>GGCCTTCGGG CCAA                                             |
| NA | Rnd1Rev | 5'- GACTGGAGTTCAGACGTGTGCTCTTCCGATCT<br>NNNNNGA ACCGGACCGAAGCCCG                                 |
| NA | Rnd2Fwd | 5'- AATGATACGGCGACCACCGAGATCTACT<br>CTTCCCTA CACGACGCTCTTCCG                                     |
| NA | Rnd2Rev | 5'-CAAGCAGAAGACGGCATAACGAGATXXXXXXXXX<br>GACTGG AGTTCAGAC<br>where X represents a unique barcode |

## gBlocks

| ID        | Name           | Sequence                                                                                                                                                    |
|-----------|----------------|-------------------------------------------------------------------------------------------------------------------------------------------------------------|
| 130269401 | RsmZ_GGA124567 | 5'- TAATACGACTCACTATAGCGTACAGCCTA<br>CACGCAACCCCGAACCTTCGGGGAAGCCT<br>CGTCGCCAGCCTGGCGATTCATCACCTTGA<br>TGACGAGCCTCTGAAGAGTGGGCGGGGTA<br>ATACCCCGCCCTTTTTT  |
| 130269402 | RsmZ_GGA147    | 5'- TAATACGACTCACTATAGCGTACAGCCTACA<br>CGCAACCCCGAAGGATCGGGGAAGCCTCG<br>TCGCCAGGGAGGCGATTCATCAGGATGATG<br>ACGAGCCTCTGA AGAGTGGGCGGGGTAAT<br>ACCCCGCCCTTTTTT |

Table S3. Primers and gBlocks used in this study (cont.).

| gBlocks ID | Name              | Sequence                                                                                                                                                                                                                                                         |
|------------|-------------------|------------------------------------------------------------------------------------------------------------------------------------------------------------------------------------------------------------------------------------------------------------------|
| 130629833  | RsmY_GGA123457    | 5'- TATTTCTCAAGTGACGGGATGCCGCTAT<br>TGAGTATGCATAATACGACTCACTATAGG<br>TCACCTCATTGCGCACCTAGCGCCAAAGA<br>CAATACCCTAACCAAGCCTATCCACCATCC<br>TTGGTGGCGTAGCACGGATGTCACCTTAG<br>AGGTCTGCAAACCCCGCCCAAAGGCGG<br>GTTTTCTTCTCAACTTTCAACTCTTTGCGC<br>AACGGAAGTGGAGTCGTTAAGC |
| 130851998  | RsmY_GGA134       | 5'- TATTTCTCAAGTGACGGGATGCCGCTAT<br>TGAGTATGCATAATACGACTCACTATAGG<br>TCACCTCATTGCGCAGGAAGCGCCAAAG<br>ACAATACCCTAACCAAGCCTATCCACCAT<br>GGATGGTGGCGTAGCACGGATGTCAGGA<br>TAGAGGTCTGCAAACCCCGCCCAAAGG<br>CGGGTTTTCTTCTCAACTTTCAACTCTTT<br>CGCCAACGGAAGTGGAGTCGTTAAGC |
| NA         | RsmY_SHAPE_gBlock | 5'- TAATACGACTCACTATAGGGGGCCTTCGG<br>GCCAAGTCAGGACATTGCGCAGGAAGCG<br>CCAAAGACAATACGGAACCAAGGGAATC<br>CACCATGGATGGTGGCGTAGCACGGATGT<br>CAGGATAGAGGTCTGCAAACCCCGCCCA<br>AAAGGCGGGTTTTTCGATCCGGTTCGCC<br>GGATCCAAATCGGGCTTCGGTCCGGTTC                               |
| NA         | RsmZ_SHAPE_gBlock | 5'- TAATACGACTCACTATAGGGGGCCTTCGG<br>GCCAACGTACAGGGAACACGCAACCCCG<br>AAGGATCGGGGAAGGGACGTCGCCAGGG<br>AGGCGATTCATCAGGATGATGACGAGGG<br>ACTGAAGAGTGGGCGGGTAATACCCCG<br>CCCCTTTTTTCGATCCGGTTCGCCGGATC<br>CAAATCGGGCTTCGGTCCGGTTC                                     |

**REFERENCES**

1. Hanahan D. 1983. Studies on transformation of *Escherichia coli* with plasmids. *J Mol Biol* **166**: 557-580
2. Intile PJ, Diaz MR, Urbanowski ML, Wolfgang MC, Yahr TL. 2014. The AlgZR two-component system recalibrates the RsmAYZ posttranscriptional regulatory system to inhibit expression of the *Pseudomonas aeruginosa* type III secretion system. *J Bacteriol* **196**:357-66
3. Marden JN, Diaz MR, Walton WG, Gode CJ, Betts L, Urbanowski ML, Redinbo MR, Yahr TL, Wolfgang MC. 2013. An unusual CsrA family members operates in series with RsmA to amplify posttranscriptional responses in *Pseudomonas aeruginosa*. *Proc Natl Acad Sci USA* **110**:15055-60
4. Simon R, Priefer U, Puhler A. 1983. A Broad Host Range Mobilization System for In Vivo Genetic Engineering: Transposon Mutagenesis in Gram Negative Bacteria. *Nat Biotech* **1**:784-791.
5. Newman JR and Fuqua C. 1999. Broad-host-range expression vectors that carry the L-arabinose-inducible *Escherichia coli* *araBAD* promoter and the *araC* regulator. *Gene* **227**:197-203.
6. Hoang, TT, Kutchma, AJ, Becher, A, and Schweizer HP. 2000. Integration-proficient plasmids for *Pseudomonas aeruginosa*: site-specific integration and use for engineering of reporter and expression strains. *Plasmid* **43**:59-72.

|      |                  |          |     |
|------|------------------|----------|-----|
|      | RsmA/F consensus | CAnGGAYG |     |
| RsmY | GGA site 1       | CAGGGAuC | 4/8 |
|      | GGA site 2       | GAaGGAuC | 5/8 |
|      | GGA site 3       | UAcGGAaA | 4/8 |
|      | GGA site 4       | CAGGGAuU | 4/8 |
|      | GGA site 5       | CAuGGAuG | 7/8 |
|      | GGA site 6       | CACGGAuG | 7/8 |
|      | GGA site 7       | UCaGGAuA | 4/8 |
|      |                  |          |     |
|      | RsmA/F consensus | CAnGGAYG |     |
| RsmZ | GGA site 1       | UCaGGAcA | 4/8 |
|      | GGA site 2       | CGcGGAaG | 5/8 |
|      | GGA site 3       | UCgGGAaG | 4/8 |
|      | GGA site 4       | AAgGGAaC | 4/8 |
|      | GGA site 5       | CAGGGAaG | 6/8 |
|      | GGA site 6       | UCaGGAuG | 5/8 |
|      | GGA site 7       | CGaGGAcU | 5/8 |

**Figure S1.** Comparison of each GGA sequence in RsmY and RsmZ to the full 8 nt consensus binding sites for RsmA and RsmF. The GGA sequence is highlighted in red typeface and the nt positions that match consensus at the remaining positions (non-GGA) are highlighted in blue typeface.



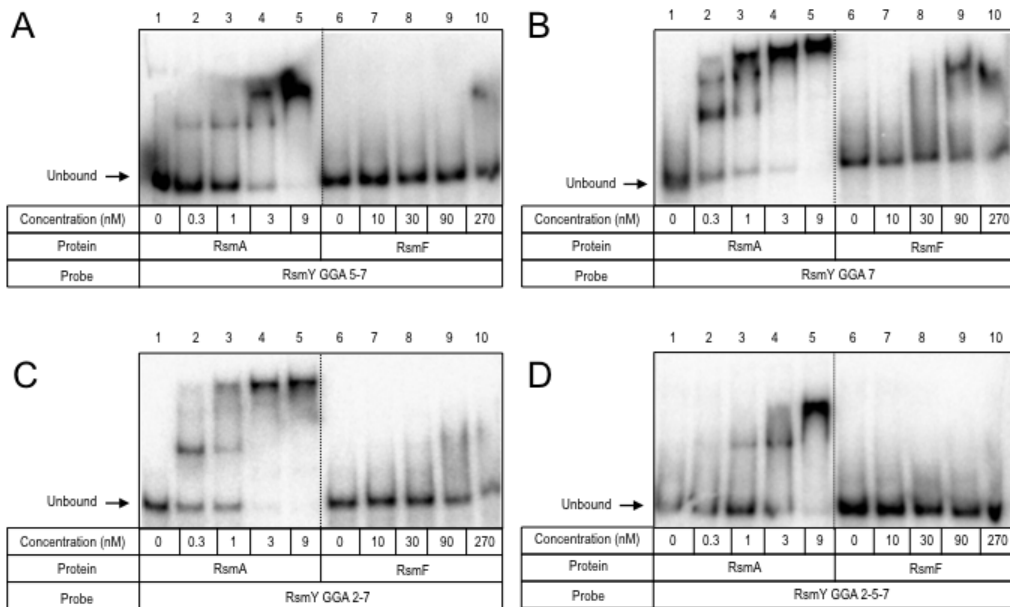

**Figure S2.** RsmA and RsmF binding to RsmY GGA single and double mutants. RsmY mutant RNA was radiolabeled and used in electrophoretic mobility shift assays with RsmA (lanes 1-5) and RsmF (lanes 6-10) Unbound RNA is indicated by an arrow.

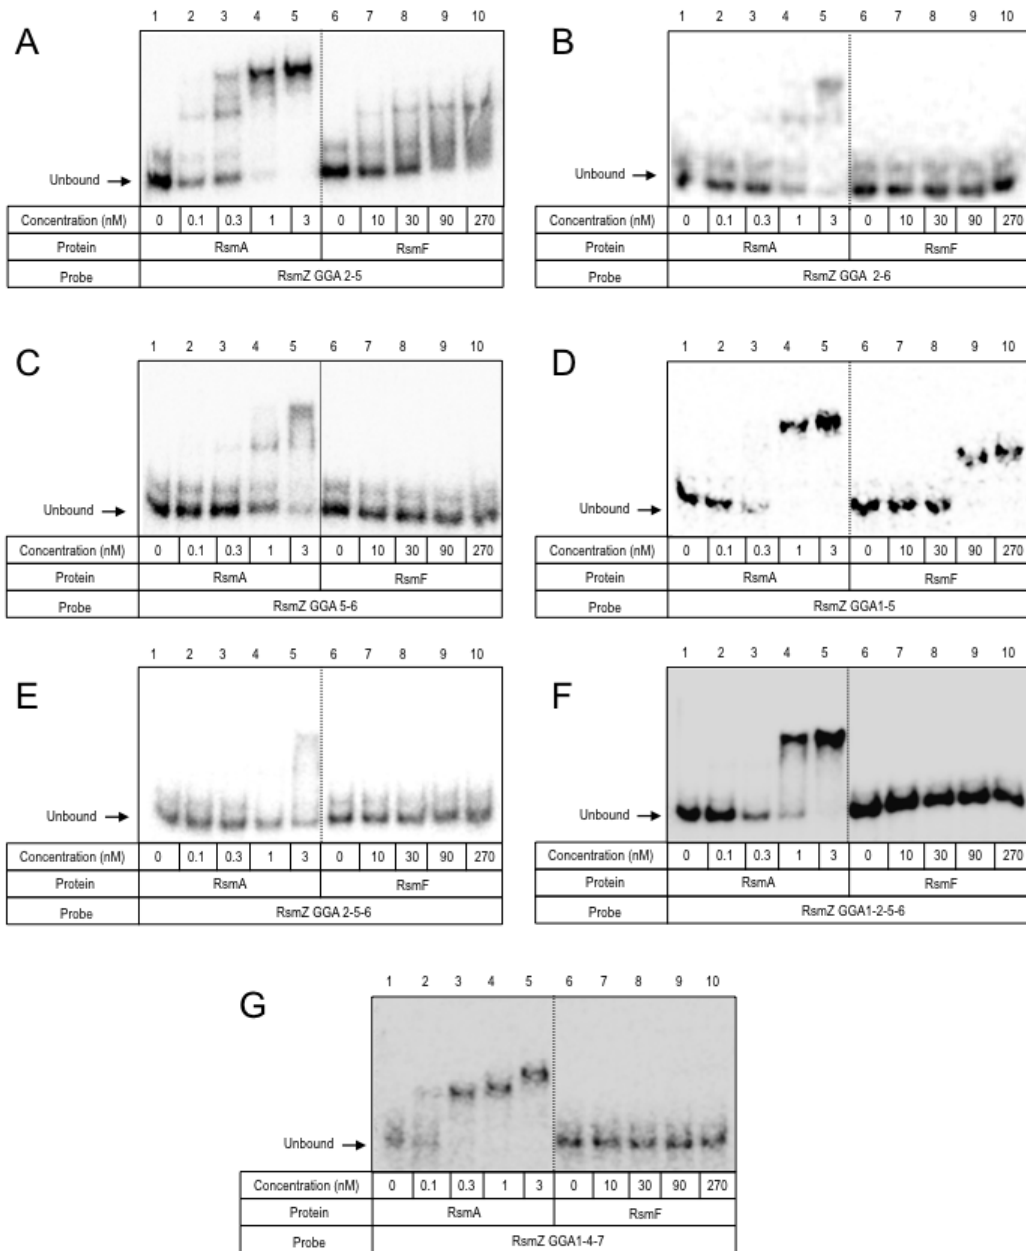

**Figure S3.** RsmA and RsmF binding to RsmZ GGA single, double, and triple mutants.

RsmZ mutant RNA was radiolabeled and used in electrophoretic mobility shift assays with RsmA (lanes 1-5) and RsmF (lanes 6-10). Unbound RNA is indicated by an arrow.

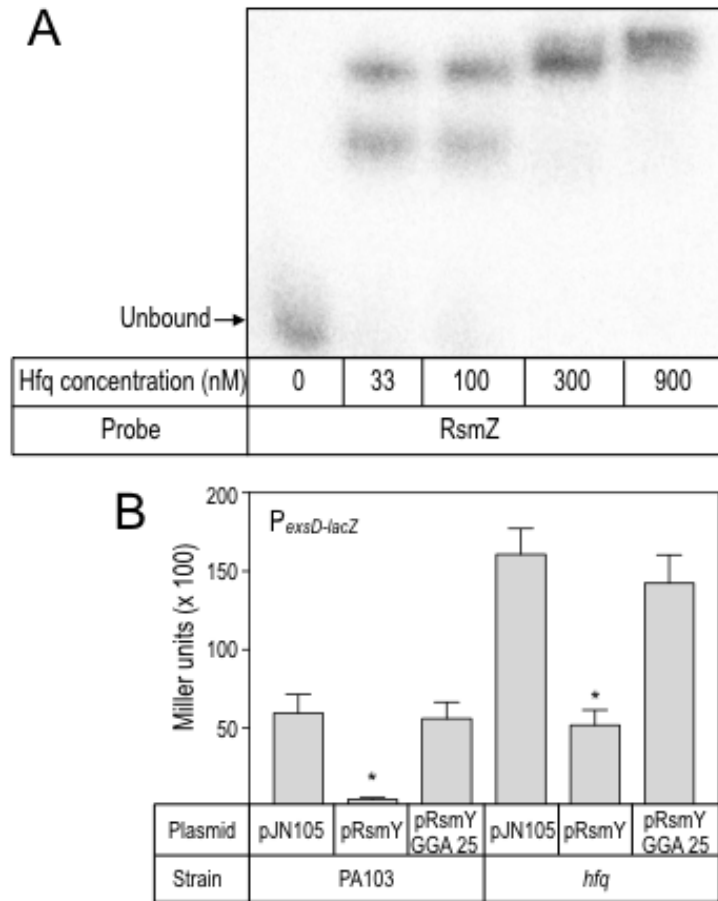

**Figure S4.** A) Hfq binding to RsmZ. RsmZ RNA was radiolabeled and used in electrophoretic mobility shift assays. B) PA103 or the  $\Delta hfq$  mutant carrying the  $P_{exsD-lacZ}$  transcriptional reporter were transformed with either vector control, wild type RsmY, or the RsmY GGA2 expression plasmids. The resulting strains were cultured in the presence of 0.1% arabinose to induce expression of the respective RNAs and assayed for  $\beta$ -galactosidase activity. Reported values represent the average of two experiments with the standard error indicated. P-value  $<0.05$  when compared to expression of the wt vector is indicated (\*).
